# Supplementary material for: SPEEDY-NEMO: performance and applications of a fully-coupled intermediate-complexity climate model
Source: Springer Nature journal article supplement (doi:10.1007/s00382-023-07097-8), 2024-02-07
Supplement: MOESM1 [file 382_2023_7097_MOESM1_ESM%20%285%29.docx]

Supplementary Material of ‘The SPEEDY-NEMO intermediate complexity coupled model’


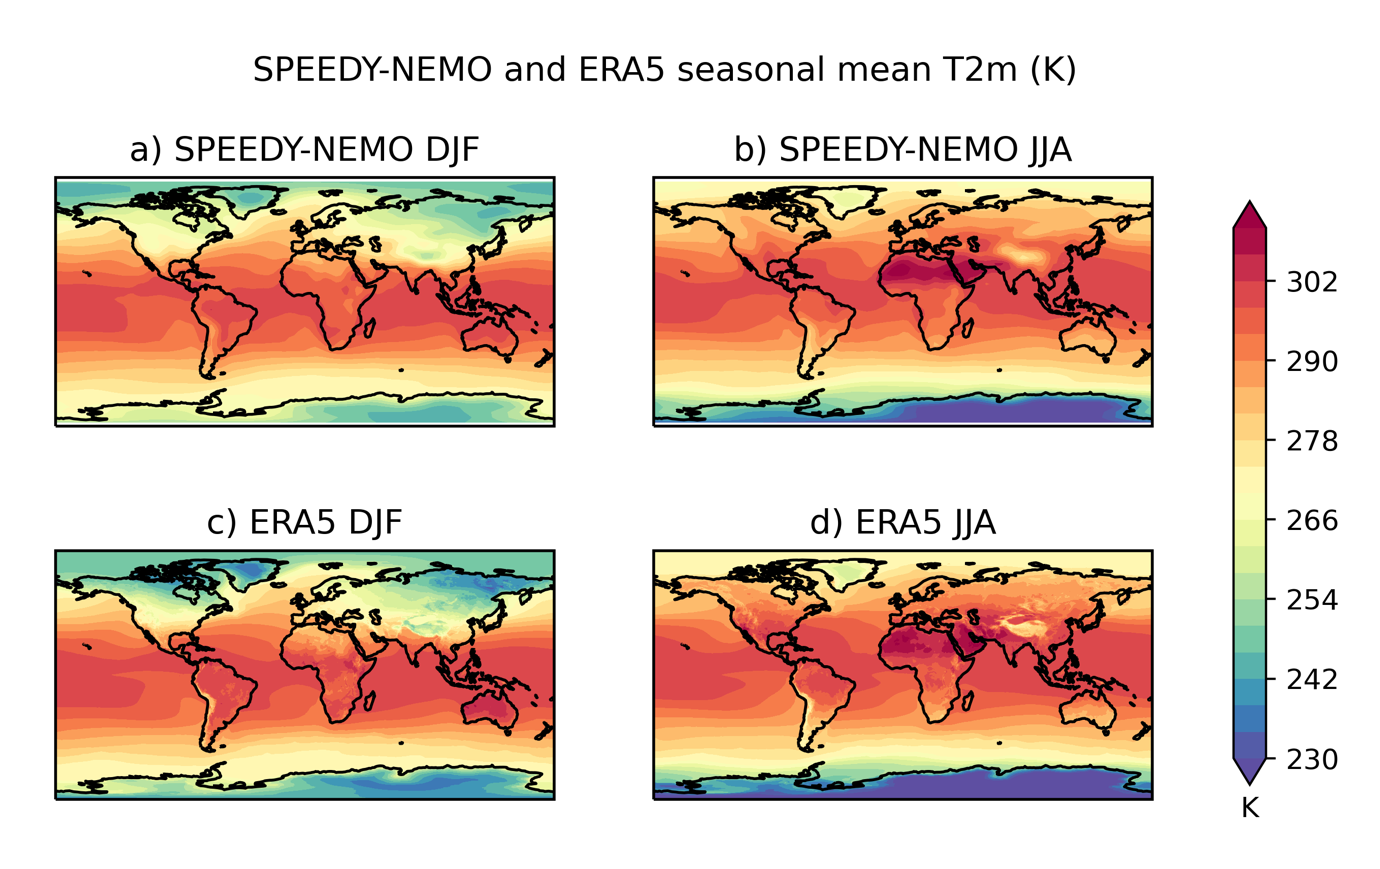


Figure S1: Climatology of near-surface air temperature (K) in a) DJF and b) JJA for the SPEEDY-NEMO model and the c-d) the ERA5 reanalysis
